# Supplementary material for: Enhanced oxidative stress and presence of ventricular aneurysm for risk prediction in cardiac sarcoidosis
Source: PubMed Central journal article supplement — Heart. 2022 Jan 25;108(6):429–37. doi: 10.1136/heartjnl-2021-320244 (PMC8899481; doi:10.1136/heartjnl-2021-320244), 2022-01-25
Supplement: heartjnl-2021-320244supp001.pdf [file heartjnl-2021-320244supp001.pdf]

## S-Figure 1

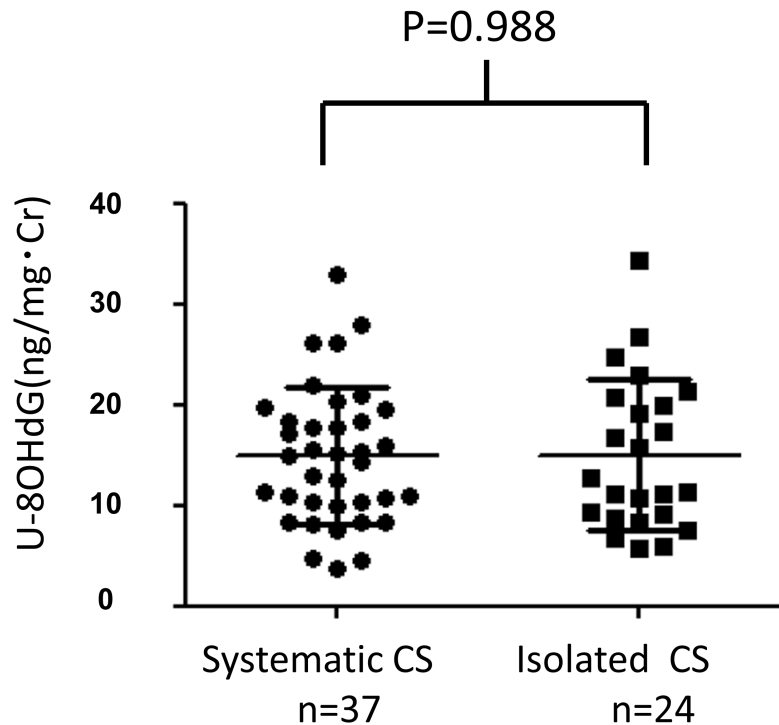

To investigate whether whole body burden of sarcoidosis influenced the levels of U-8-OHdG, we compared U-8OHdG levels between systemic CS (CS with extracardiac sarcoidosis) (N=37) and isolated CS (N=24) (Table 1). There was no difference in U-8-OHdG levels between systemic CS and isolated CS (systemic CS;  $14.9 \pm 6.8$  ng/mg·Cr vs isolated CS;  $15.0 \pm 7.5$  ng/mg·Cr,  $P=0.99$ ).
